# Supplementary material
Source: PubMed Central journal article supplement (PMC3992874)
Supplement: NIHMS572038-supplement-Supplemental_table_and_legends.pdf [file NIHMS572038-supplement-Supplemental_table_and_legends.pdf]

## SUPPLEMENTAL DATA

**Supplemental Table. Tissue biodistribution of <sup>111</sup>In-tVCAM-4 in nude mice 4 hours after probe injection.**

| <b>Tissue</b> | <b>Mean<br/>(% dose injected/g)</b> | <b>Std Dev</b> |
|---------------|-------------------------------------|----------------|
| Kidney        | 44.24                               | 12.62          |
| Liver         | 0.68                                | 0.06           |
| Pancreas      | 0.74                                | 0.23           |
| Spleen        | 0.41                                | 0.08           |
| Lung          | 0.38                                | 0.03           |
| Heart         | 0.22                                | 0.04           |

**Supplemental Figure 1.** SPECT images of <sup>111</sup>In-tVCAM-4 peptide 4 hours after IP injection into saline control injected (Control) or tumor-bearing (SKOV3ip1) animals. Representative coronal and sagittal sections taken from the same plane of each animal are displayed.

**Supplemental Figure 2.** LP9 cells treated as for Figure 3B were subjected to qRT-PCR for VCAM-1 and GUSB (housekeeping control). Data represent the  $\Delta\Delta C_t$  values for each point normalized to the untreated control.

**Supplemental Figure 3. (A)** SPECT/CT images were collected weekly starting 1 week after tumor initiation (week 0) as described in Figure 4A; weeks 0, 1 and 2 indicate time after carboplatin treatment. Representative coronal and sagittal SPECT images (same plane for each animal) of <sup>111</sup>In-tVCAM-4 peptide obtained

4 hours after IP injection are depicted. **(B)** Correlative histology demonstrating VCAM-1 expression on the mesothelium (arrows). At week 0, A2780 and A2780Cis show similar VCAM-1 reactivity; weeks 1 and 2 show increased VCAM-1 reactivity in mice containing A2780Cis cells compared to those with A2780 cells. Note the lack of reactivity in the control slide obtained from a mouse without tumor cells. 60X images with 20X insets.
