# Supplementary material
Source: PubMed Central journal article supplement (PMC3992874)

# Supplemental Figure 1

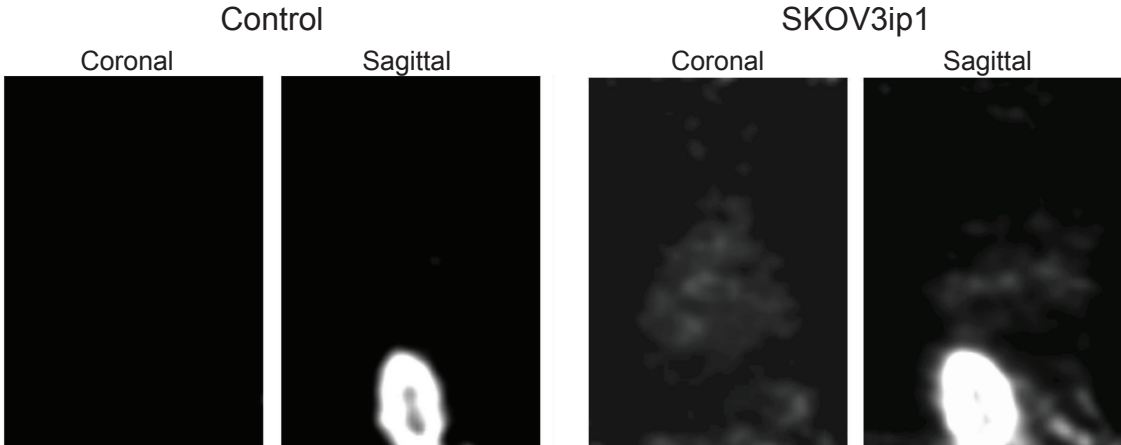

Supplement: NIHMS572038-supplement-Supp_fig_1.pdf [file NIHMS572038-supplement-Supp_fig_1.pdf]

# Supplemental Figure 2

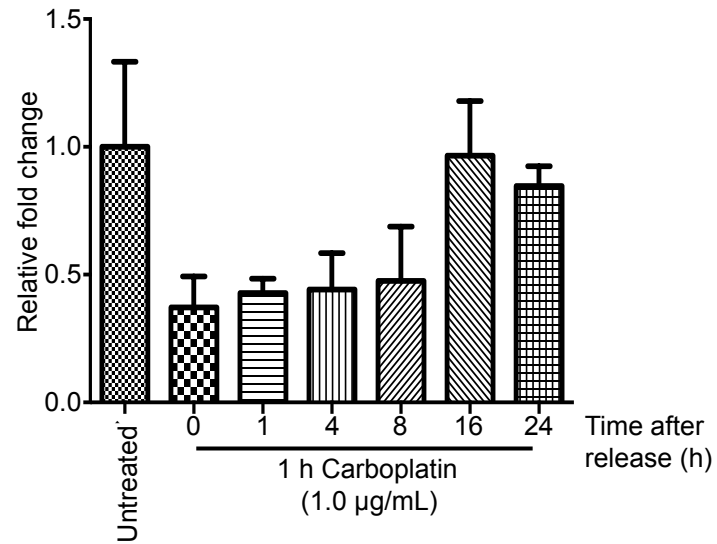

Supplement: NIHMS572038-supplement-Supp_fig_2.pdf [file NIHMS572038-supplement-Supp_fig_2.pdf]

# Supplemental Figure 3

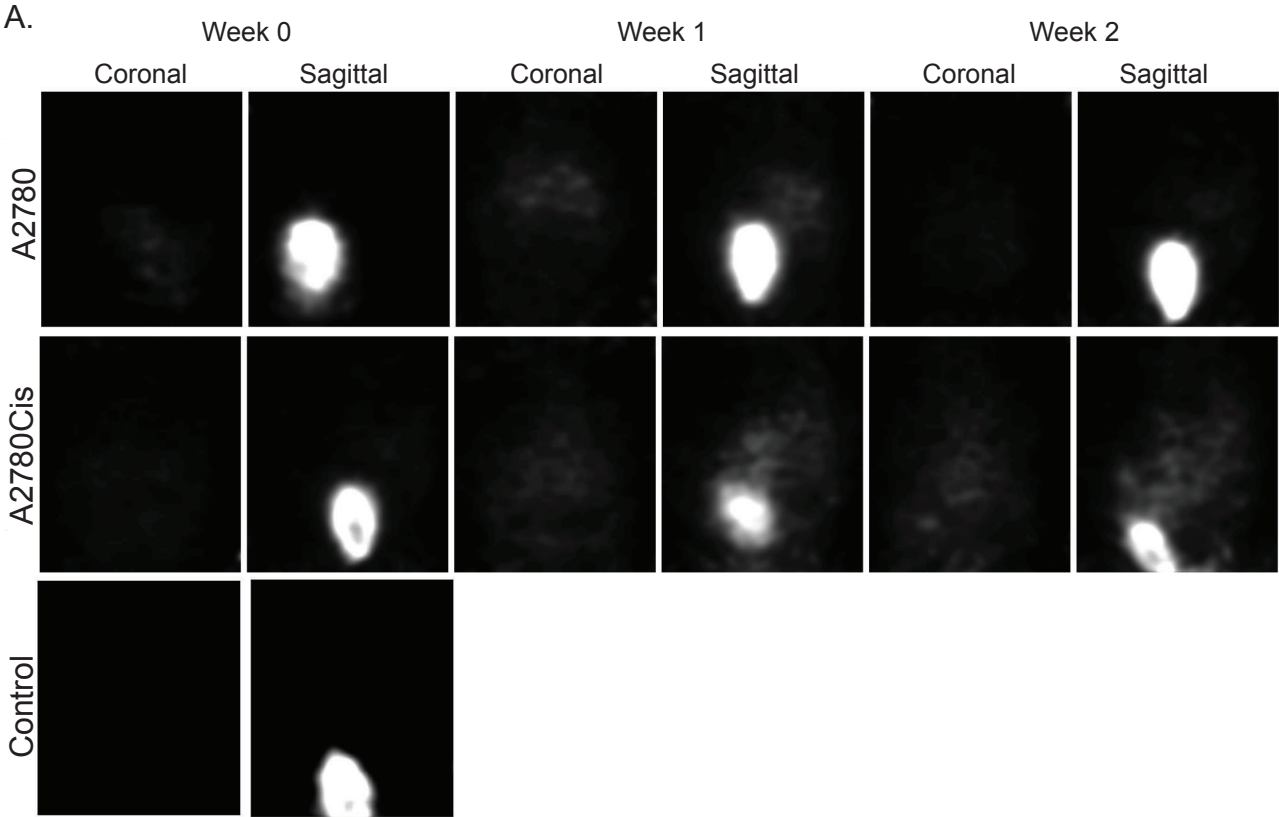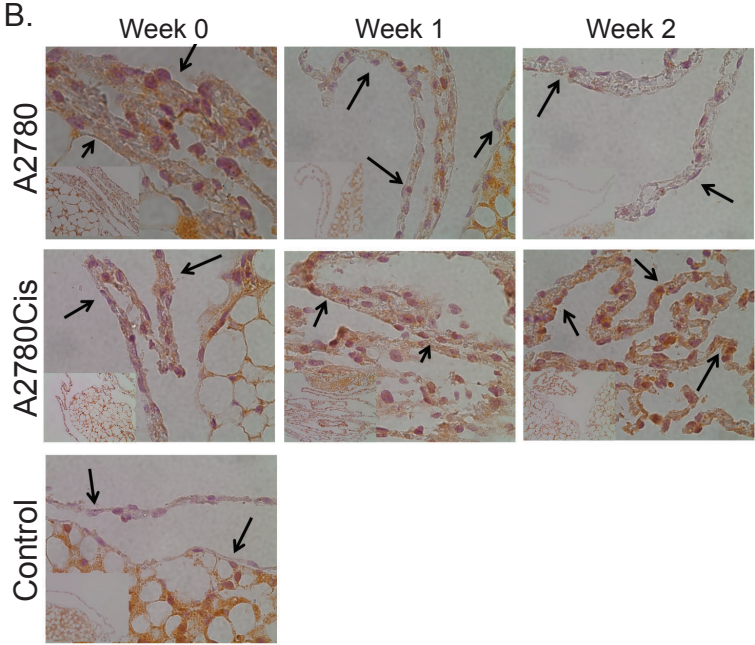

Supplement: NIHMS572038-supplement-Supp_fig_3.pdf [file NIHMS572038-supplement-Supp_fig_3.pdf]
